# Supplementary material
Source: PubMed Central journal article supplement (PMC3233099)

Supplemental figure 2. *Xba*I, *Spe*I and *Not*I PFGE patterns of 47 isolates sequenced in this study. PFGE subtyping was performed according to the CDC PulseNet protocol. BioNumerics version 5.1 (Applied Maths, Austin, TX) was used to analyze the PFGE patterns. The PFGE patterns are ordered according to their alphabetical pattern designation.

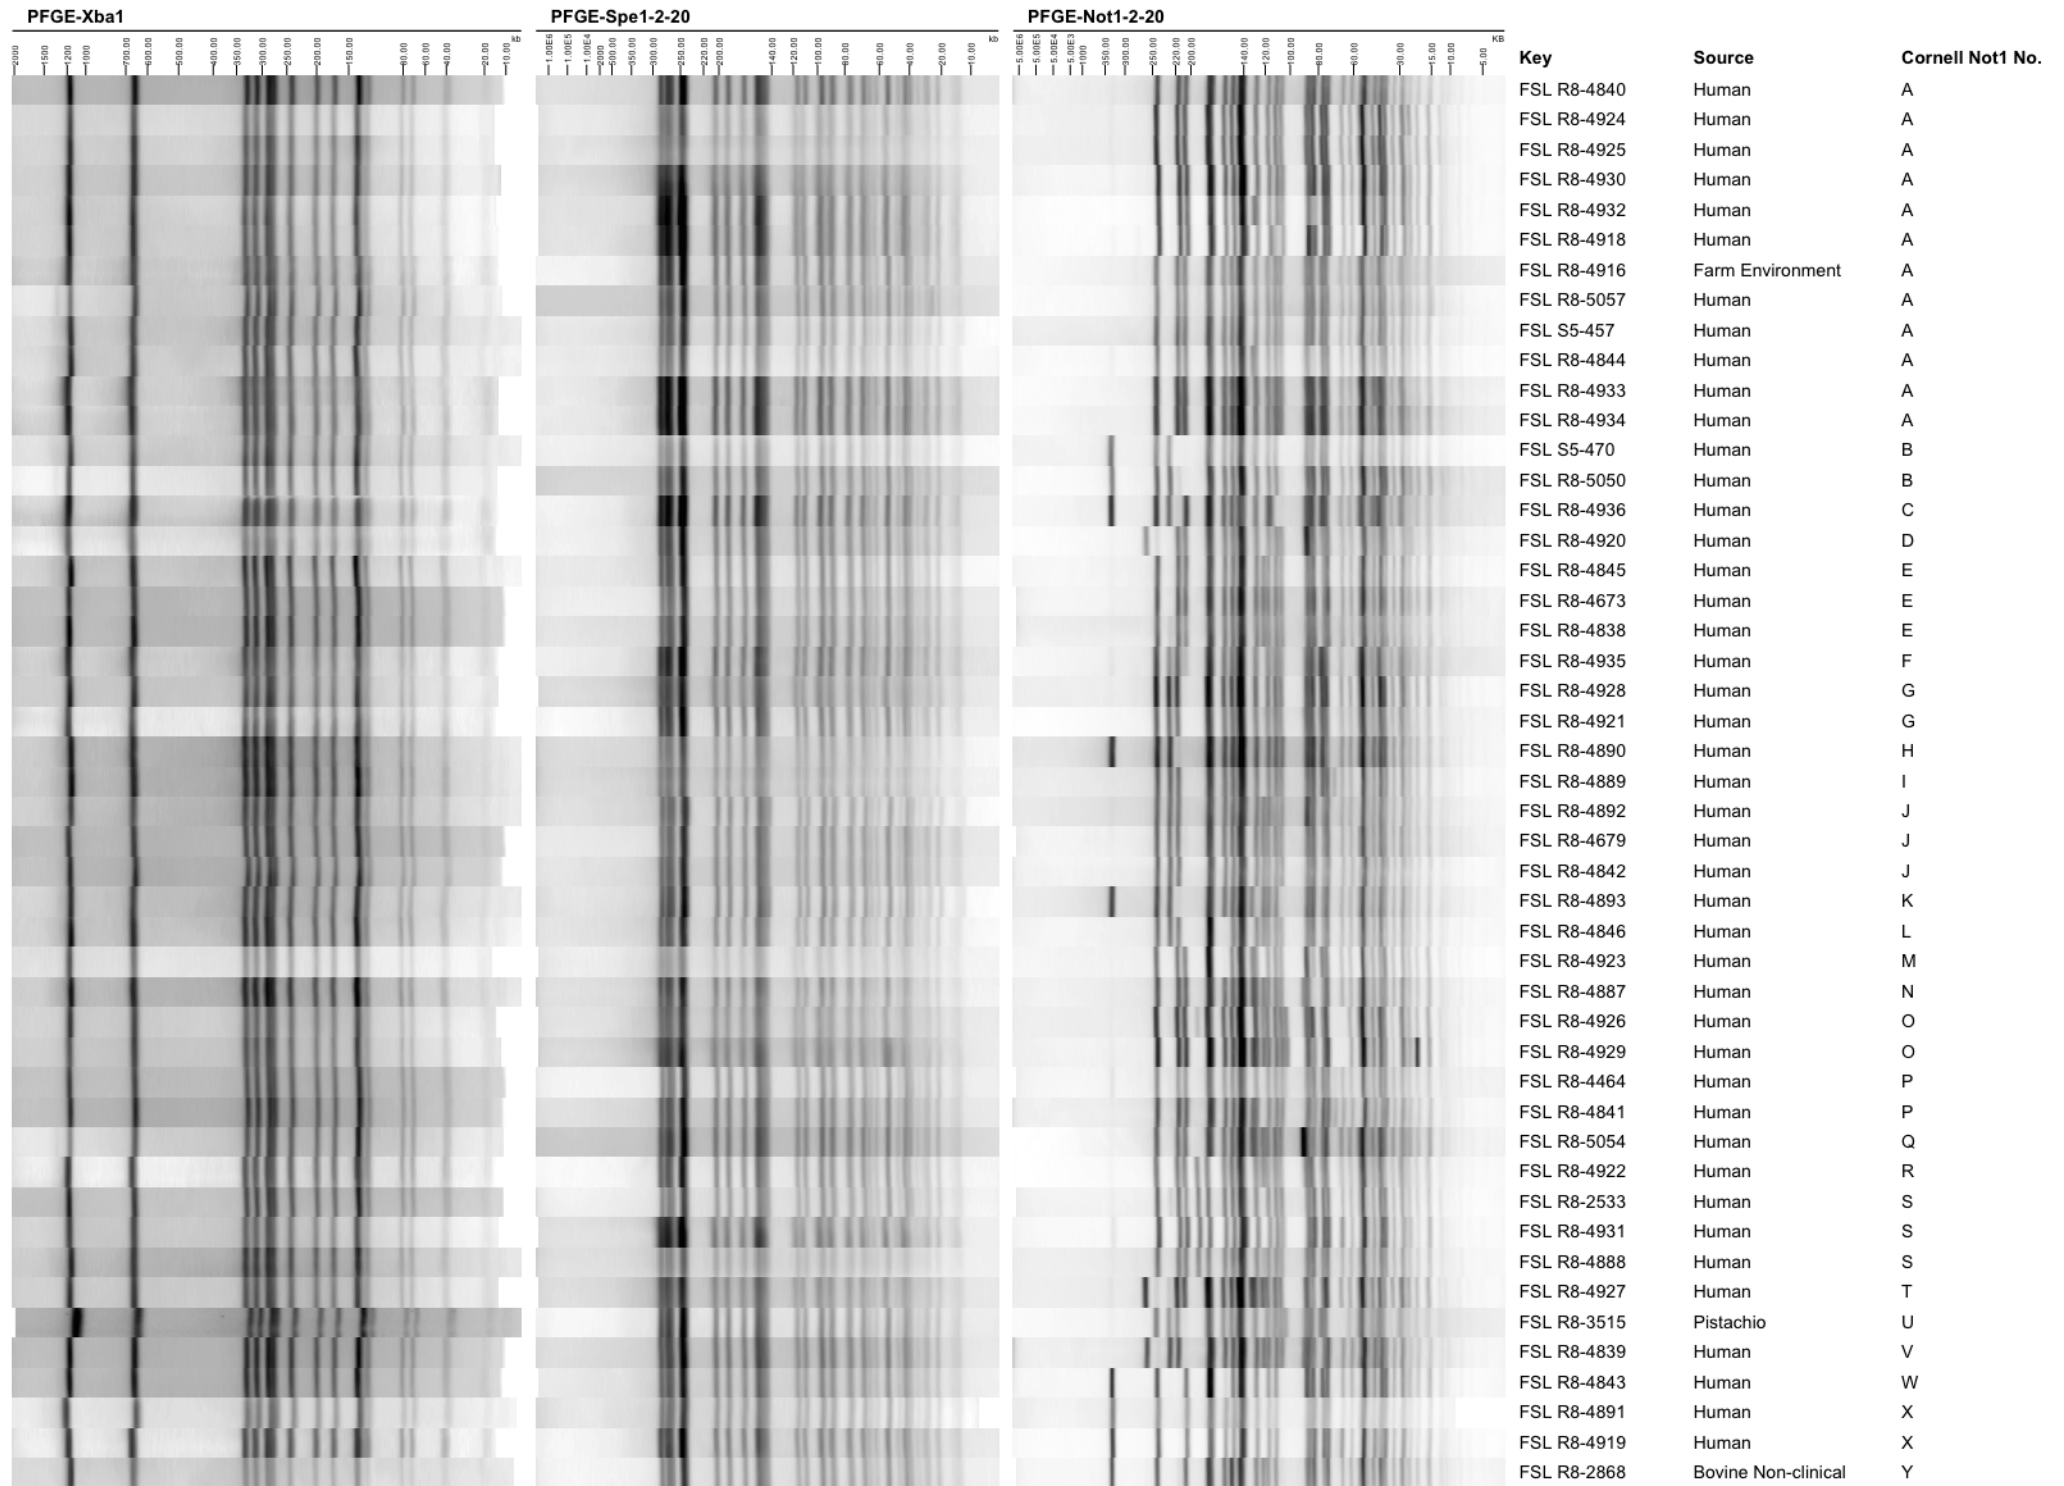

Supplement: supp_77.24.8648_AEM6538-11_FigS2.pdf [file supp_77.24.8648_AEM6538-11_FigS2.pdf]
